# Supplementary material for: A Novel Three-LncRNA Signature Predicting Tumor Recurrence in Nonfunctioning Pituitary Adenomas
Source: Front Genet. 2021 Oct 20;12:754503. doi: 10.3389/fgene.2021.754503 (PMC8564111; doi:10.3389/fgene.2021.754503)
Supplement: Supplementary file 6 [file Table6.XLS]

## Sheet: Sheet1
Table S6. Functional enrichment analysis of the prognostic genes in lncRNA signature
ONTOLOGY	ID	Description	GeneRatio	pvalue	p.adjust	qvalue	Count	SYMBOL_ID
BP	GO:0060271	cilium assembly	45/888	2.54795e-08	0.000103774	0.000102501	45	ARL3,ATMIN,ATXN10,B9D1,BBS1,BBS2,BBS4,CELSR3,CEP126,CEP63,CEP70,CEP72,CEP97,CFAP20,CYLD,DNAH14,DYNC2H1,FAM161A,IFT43,IFT46,IFT74,IFT88,IQCB1,KIF3A,NME5,NPHP1,PIBF1,PTPN23,RFX2,RFX3,TCTEX1D2,TCTN1,TCTN2,TMEM17,TMEM80,TRIP11,TTBK2,TTC26,TTC30A,TTC30B,UNC119B,WDR34,WDR5B,WRAP73,YWHAE
BP	GO:0006397	mRNA processing	54/888	7.15005e-08	0.000103774	0.000102501	54	ALKBH5,BCAS2,CASC3,CHTOP,CMTR1,CPEB1,CSTF3,CWC22,DDX1,DDX42,DDX46,DDX47,DHX15,DHX9,ELAVL1,GCFC2,HNRNPA0,HNRNPD,HNRNPH3,HNRNPK,HNRNPR,IK,KIN,LSM5,LUC7L3,MAGOH,MBNL2,NOVA1,PHRF1,PLRG1,POLR2K,PPIE,PRPF18,PRPF38A,PRPF8,RBM39,RBM4B,RBM8A,RSRC1,SF3A1,SF3B2,SLTM,SNRNP200,SNRPD1,SNRPD3,SNRPE,SNRPF,SRSF1,SRSF6,SYNCRIP,TARDBP,WBP4,ZC3H11A,ZRANB2
BP	GO:0044782	cilium organization	45/888	7.27047e-08	0.000103774	0.000102501	45	ARL3,ATMIN,ATXN10,B9D1,BBS1,BBS2,BBS4,CELSR3,CEP126,CEP63,CEP70,CEP72,CEP97,CFAP20,CYLD,DNAH14,DYNC2H1,FAM161A,IFT43,IFT46,IFT74,IFT88,IQCB1,KIF3A,NME5,NPHP1,PIBF1,PTPN23,RFX2,RFX3,TCTEX1D2,TCTN1,TCTN2,TMEM17,TMEM80,TRIP11,TTBK2,TTC26,TTC30A,TTC30B,UNC119B,WDR34,WDR5B,WRAP73,YWHAE
BP	GO:0000377	RNA splicing, via transesterification reactions with bulged adenosine as nucleophile	40/888	1.73038e-07	0.000129966	0.000128372	40	BCAS2,CASC3,CSTF3,CWC22,DDX1,DDX42,DDX46,DHX15,DHX9,ELAVL1,GCFC2,HNRNPA0,HNRNPD,HNRNPH3,HNRNPK,HNRNPR,LSM5,LUC7L3,MAGOH,MBNL2,NOVA1,PLRG1,POLR2K,PPIE,PRPF18,PRPF38A,PRPF8,RBM8A,RSRC1,SF3A1,SF3B2,SNRNP200,SNRPD1,SNRPD3,SNRPE,SNRPF,SRSF1,SRSF6,SYNCRIP,WBP4
BP	GO:0000398	mRNA splicing, via spliceosome	40/888	1.73038e-07	0.000129966	0.000128372	40	BCAS2,CASC3,CSTF3,CWC22,DDX1,DDX42,DDX46,DHX15,DHX9,ELAVL1,GCFC2,HNRNPA0,HNRNPD,HNRNPH3,HNRNPK,HNRNPR,LSM5,LUC7L3,MAGOH,MBNL2,NOVA1,PLRG1,POLR2K,PPIE,PRPF18,PRPF38A,PRPF8,RBM8A,RSRC1,SF3A1,SF3B2,SNRNP200,SNRPD1,SNRPD3,SNRPE,SNRPF,SRSF1,SRSF6,SYNCRIP,WBP4
BP	GO:0000375	RNA splicing, via transesterification reactions	40/888	2.21156e-07	0.000129966	0.000128372	40	BCAS2,CASC3,CSTF3,CWC22,DDX1,DDX42,DDX46,DHX15,DHX9,ELAVL1,GCFC2,HNRNPA0,HNRNPD,HNRNPH3,HNRNPK,HNRNPR,LSM5,LUC7L3,MAGOH,MBNL2,NOVA1,PLRG1,POLR2K,PPIE,PRPF18,PRPF38A,PRPF8,RBM8A,RSRC1,SF3A1,SF3B2,SNRNP200,SNRPD1,SNRPD3,SNRPE,SNRPF,SRSF1,SRSF6,SYNCRIP,WBP4
BP	GO:0008380	RNA splicing	48/888	2.22416e-07	0.000129966	0.000128372	48	BCAS2,CASC3,CSTF3,CWC22,DDX1,DDX25,DDX42,DDX46,DDX47,DHX15,DHX9,ELAVL1,GCFC2,HNRNPA0,HNRNPD,HNRNPH3,HNRNPK,HNRNPR,IK,LSM5,LUC7L3,MAGOH,MBNL2,MTERF4,NOVA1,PLRG1,POLR2K,PPIE,PRPF18,PRPF38A,PRPF8,RBM39,RBM4B,RBM8A,RSRC1,SF3A1,SF3B2,SNRNP200,SNRPD1,SNRPD3,SNRPE,SNRPF,SRSF1,SRSF6,SYNCRIP,TARDBP,WBP4,ZRANB2
BP	GO:0031503	protein-containing complex localization	33/888	2.42814e-07	0.000129966	0.000128372	33	ALKBH5,ARL3,CASC3,CEP72,CHTOP,DDX25,DYNC2H1,IFT43,IFT46,IFT74,IFT88,KIF3A,KIF5A,MAGOH,NSG1,NUP133,NUP153,NUP205,NUP35,POM121C,RBM8A,SNAP25,SNAP47,SRSF1,SRSF6,TCTEX1D2,TERF1,TRIP11,TTC26,TTC30A,TTC30B,WDR34,ZC3H11A
BP	GO:0033108	mitochondrial respiratory chain complex assembly	19/888	3.5358e-07	0.000168226	0.000166162	19	COA5,COX14,COX20,IMMP1L,NDUFA12,NDUFA13,NDUFA5,NDUFA6,NDUFA7,NDUFA8,NDUFAF3,NDUFAF7,NDUFB1,NDUFB6,NDUFC2,PET117,SCO1,TIMM21,UQCC3
BP	GO:0042073	intraciliary transport	13/888	7.57926e-07	0.000324544	0.000320563	13	ARL3,DYNC2H1,IFT43,IFT46,IFT74,IFT88,KIF3A,TCTEX1D2,TRIP11,TTC26,TTC30A,TTC30B,WDR34
BP	GO:0010970	transport along microtubule	22/888	2.71584e-06	0.000969103	0.000957215	22	AP3B2,ARL3,DST,DYNC1I1,DYNC2H1,IFT43,IFT46,IFT74,IFT88,KIF3A,KIF5A,PRKCZ,SPG7,SYBU,TCTEX1D2,TERF2,TRIP11,TTC26,TTC30A,TTC30B,WDR34,BICD1
BP	GO:0099111	microtubule-based transport	22/888	2.71584e-06	0.000969103	0.000957215	22	AP3B2,ARL3,DST,DYNC1I1,DYNC2H1,IFT43,IFT46,IFT74,IFT88,KIF3A,KIF5A,PRKCZ,SPG7,SYBU,TCTEX1D2,TERF2,TRIP11,TTC26,TTC30A,TTC30B,WDR34,BICD1
BP	GO:0007018	microtubule-based movement	34/888	1.81166e-05	0.00590411	0.00583168	34	AP3B2,ARL3,BBS2,BBS4,CFAP20,DNAH14,DNAL4,DST,DYNC1I1,DYNC2H1,IFT43,IFT46,IFT74,IFT88,KIF3A,KIF5A,KLC2,MAATS1,MYH9,MYO9B,NME5,PRKCZ,RFX3,SPA17,SPG7,SYBU,TCTEX1D2,TERF2,TRIP11,TTC26,TTC30A,TTC30B,WDR34,BICD1
BP	GO:0042775	mitochondrial ATP synthesis coupled electron transport	16/888	1.93035e-05	0.00590411	0.00583168	16	NDUFA12,NDUFA13,NDUFA5,NDUFA6,NDUFA7,NDUFA8,NDUFB1,NDUFB6,NDUFC2,PARK7,PMPCB,UQCC3,UQCRFS1,UQCRH,UQCRHL,COX7C
BP	GO:0035735	intraciliary transport involved in cilium assembly	10/888	2.10529e-05	0.0059144	0.00584185	10	DYNC2H1,IFT43,IFT46,IFT74,IFT88,KIF3A,TRIP11,TTC26,TTC30B,WDR34
BP	GO:0042773	ATP synthesis coupled electron transport	16/888	2.20996e-05	0.0059144	0.00584185	16	NDUFA12,NDUFA13,NDUFA5,NDUFA6,NDUFA7,NDUFA8,NDUFB1,NDUFB6,NDUFC2,PARK7,PMPCB,UQCC3,UQCRFS1,UQCRH,UQCRHL,COX7C
BP	GO:0006353	DNA-templated transcription, termination	17/888	3.01772e-05	0.00735431	0.0072641	17	CASC3,CHTOP,CSTF3,DHX9,MAGOH,MTERF2,POLR1B,POLR1C,POLR2K,RBM8A,SNRPD3,SNRPE,SNRPF,SRSF1,SRSF6,TTF1,ZC3H11A
BP	GO:0030705	cytoskeleton-dependent intracellular transport	22/888	3.09149e-05	0.00735431	0.0072641	22	AP3B2,ARL3,DST,DYNC1I1,DYNC2H1,IFT43,IFT46,IFT74,IFT88,KIF3A,KIF5A,PRKCZ,SPG7,SYBU,TCTEX1D2,TERF2,TRIP11,TTC26,TTC30A,TTC30B,WDR34,BICD1
BP	GO:0045333	cellular respiration	23/888	4.82296e-05	0.0108694	0.0107361	23	COX20,FASTKD2,MDH1B,NDUFA12,NDUFA13,NDUFA5,NDUFA6,NDUFA7,NDUFA8,NDUFB1,NDUFB6,NDUFC2,OGDHL,PARK7,PMPCB,SIRT3,SUCLA2,SUCLG1,UQCC3,UQCRFS1,UQCRH,UQCRHL,COX7C
BP	GO:0010257	NADH dehydrogenase complex assembly	12/888	7.12006e-05	0.0145181	0.0143401	12	NDUFA12,NDUFA13,NDUFA5,NDUFA6,NDUFA7,NDUFA8,NDUFAF3,NDUFAF7,NDUFB1,NDUFB6,NDUFC2,TIMM21
BP	GO:0032981	mitochondrial respiratory chain complex I assembly	12/888	7.12006e-05	0.0145181	0.0143401	12	NDUFA12,NDUFA13,NDUFA5,NDUFA6,NDUFA7,NDUFA8,NDUFAF3,NDUFAF7,NDUFB1,NDUFB6,NDUFC2,TIMM21
BP	GO:0071826	ribonucleoprotein complex subunit organization	25/888	0.000151469	0.0294814	0.0291197	25	BRIX1,CIRBP,DDX1,DHX30,DHX9,FASTKD2,GCFC2,HSP90AB1,LUC7L3,MRRF,MTERF4,PRPF18,PRPF8,RPF1,SBDS,SF3A1,SNRNP200,SNRPD1,SNRPD3,SNRPE,SNRPF,SRSF1,SRSF6,TAF9,BICD1
BP	GO:0022618	ribonucleoprotein complex assembly	24/888	0.000163195	0.0297098	0.0293454	24	BRIX1,CIRBP,DDX1,DHX30,DHX9,FASTKD2,GCFC2,HSP90AB1,LUC7L3,MTERF4,PRPF18,PRPF8,RPF1,SBDS,SF3A1,SNRNP200,SNRPD1,SNRPD3,SNRPE,SNRPF,SRSF1,SRSF6,TAF9,BICD1
BP	GO:0022904	respiratory electron transport chain	16/888	0.000166519	0.0297098	0.0293454	16	NDUFA12,NDUFA13,NDUFA5,NDUFA6,NDUFA7,NDUFA8,NDUFB1,NDUFB6,NDUFC2,PARK7,PMPCB,UQCC3,UQCRFS1,UQCRH,UQCRHL,COX7C
BP	GO:0043966	histone H3 acetylation	11/888	0.00017461	0.0299072	0.0295403	11	BRPF3,ELP3,KAT6B,MAP3K7,NAP1L2,SMAD4,TADA1,TADA3,TAF9,TAF9B,ZNF451
BP	GO:1905515	non-motile cilium assembly	10/888	0.000192085	0.0316349	0.0312469	10	ATMIN,BBS1,BBS2,BBS4,CEP126,IFT74,PIBF1,TMEM17,TMEM80,WRAP73
BP	GO:0006120	mitochondrial electron transport, NADH to ubiquinone	10/888	0.000227238	0.0347512	0.0343249	10	NDUFA12,NDUFA13,NDUFA5,NDUFA6,NDUFA7,NDUFA8,NDUFB1,NDUFB6,NDUFC2,PARK7
BP	GO:0065002	intracellular protein transmembrane transport	10/888	0.000227238	0.0347512	0.0343249	10	GRPEL1,NDUFA13,PEX10,PEX16,SEC63,SRP72,SRP9,TIMM13,TIMM21,TIMM22
BP	GO:0022613	ribonucleoprotein complex biogenesis	42/888	0.000285139	0.0421023	0.0415858	42	AAMP,BRIX1,CIRBP,DCAF13,DDX1,DDX47,DHX30,DHX9,DIS3L2,EBNA1BP2,EXOSC9,FASTKD2,GCFC2,GNL1,GTPBP4,HSP90AB1,KRR1,LUC7L3,METTL15,MTERF4,NGDN,NOL11,PRPF18,PRPF8,RPF1,RPL34,RPL7A,SBDS,SF3A1,SNRNP200,SNRPD1,SNRPD3,SNRPE,SNRPF,SRSF1,SRSF6,TAF9,TRMT112,UTP14C,YAE1D1,ZNF658,BICD1
BP	GO:0033617	mitochondrial respiratory chain complex IV assembly	6/888	0.000336024	0.0465362	0.0459654	6	COA5,COX14,COX20,PET117,SCO1,TIMM21
BP	GO:0006119	oxidative phosphorylation	17/888	0.000336904	0.0465362	0.0459654	17	NDUFA12,NDUFA13,NDUFA5,NDUFA6,NDUFA7,NDUFA8,NDUFB1,NDUFB6,NDUFC2,PARK7,PMPCB,TEFM,UQCC3,UQCRFS1,UQCRH,UQCRHL,COX7C
CC	GO:0098798	mitochondrial protein complex	36/932	3.70261e-08	2.17713e-05	1.84741e-05	36	APOO,BCKDHB,GRPEL1,IMMP1L,MRPL27,MRPL30,MRPL35,MRPL49,MRPL50,MRPL57,MRPS14,MRPS21,MRPS31,MRPS33,MTERF4,NDUFA12,NDUFA13,NDUFA5,NDUFA6,NDUFA7,NDUFA8,NDUFB1,NDUFB6,NDUFC2,PARK7,PMPCB,SMDT1,SPG7,TIMM13,TIMM21,TIMM22,UQCC3,UQCRFS1,UQCRH,UQCRHL,COX7C
CC	GO:0005684	U2-type spliceosomal complex	15/932	1.68271e-07	4.94718e-05	4.19793e-05	15	BCAS2,CWC22,DHX15,GCFC2,LUC7L3,PLRG1,PPIE,PRPF18,PRPF8,SF3A1,SF3B2,SNRPD1,SNRPD3,SNRPE,SNRPF
CC	GO:0005681	spliceosomal complex	28/932	2.5882e-07	5.07288e-05	4.30459e-05	28	BCAS2,CWC22,DDX25,DHX15,GCFC2,HNRNPH3,HNRNPK,HNRNPR,IK,LSM5,LUC7L3,MAGOH,PLRG1,PPIE,PRPF18,PRPF38A,PRPF8,RBM8A,SF3A1,SF3B2,SNRNP200,SNRPD1,SNRPD3,SNRPE,SNRPF,SRSF1,SYNCRIP,WBP4
CC	GO:0098800	inner mitochondrial membrane protein complex	23/932	4.85917e-07	5.3349e-05	4.52693e-05	23	APOO,GRPEL1,IMMP1L,NDUFA12,NDUFA13,NDUFA5,NDUFA6,NDUFA7,NDUFA8,NDUFB1,NDUFB6,NDUFC2,PARK7,PMPCB,SMDT1,SPG7,TIMM21,TIMM22,UQCC3,UQCRFS1,UQCRH,UQCRHL,COX7C
CC	GO:0071013	catalytic step 2 spliceosome	19/932	5.0541e-07	5.3349e-05	4.52693e-05	19	BCAS2,CWC22,DDX25,HNRNPK,HNRNPR,MAGOH,PLRG1,PPIE,PRPF8,RBM8A,SF3A1,SF3B2,SNRNP200,SNRPD1,SNRPD3,SNRPE,SNRPF,SRSF1,SYNCRIP
CC	GO:0044455	mitochondrial membrane part	30/932	5.44377e-07	5.3349e-05	4.52693e-05	30	APOO,COX7A2,FUNDC2,GRPEL1,IMMP1L,L2HGDH,MFF,MPC2,NDUFA12,NDUFA13,NDUFA5,NDUFA6,NDUFA7,NDUFA8,NDUFB1,NDUFB6,NDUFC2,PARK7,PMPCB,SCO1,SLC25A4,SMDT1,SPG7,TIMM21,TIMM22,UQCC3,UQCRFS1,UQCRH,UQCRHL,COX7C
CC	GO:0031301	integral component of organelle membrane	25/932	2.47817e-06	0.000183005	0.000155289	25	APOO,ATP6V1G2,B4GAT1,CASD1,FUNDC2,ITM2B,L2HGDH,MFF,MPC2,PEX10,PEX11B,PEX16,SCO1,SLC22A17,SLC25A4,SLC35B1,SMDT1,SPG7,STEAP2,SV2A,SYP,SYT4,TVP23B,UBIAD1,UQCC3
CC	GO:0044441	ciliary part	45/932	2.48987e-06	0.000183005	0.000155289	45	ARFGEF2,ARL3,ATP8A2,B9D1,BBS1,BBS2,BBS4,C8orf37,CEP126,CFAP20,CYLD,DYNC2H1,FAM161A,GNAQ,GNB1,GSTM3,IFT43,IFT46,IFT74,IFT88,IQCB1,IQCE,KIF3A,KIF5A,MAATS1,MOK,NAPEPLD,NEK4,NPHP1,PACRG,PIK3R4,PTPN23,SPA17,TCTEX1D2,TCTN1,TCTN2,TMEM17,TMEM80,TTBK2,TTC26,TTC30B,UNC119B,WDR34,WDR5B,WRAP73
CC	GO:0005746	mitochondrial respiratory chain	17/932	3.01724e-06	0.000197126	0.000167272	17	COX7A2,NDUFA12,NDUFA13,NDUFA5,NDUFA6,NDUFA7,NDUFA8,NDUFB1,NDUFB6,NDUFC2,PARK7,PMPCB,UQCC3,UQCRFS1,UQCRH,UQCRHL,COX7C
CC	GO:0098803	respiratory chain complex	16/932	3.93931e-06	0.000231631	0.000196551	16	NDUFA12,NDUFA13,NDUFA5,NDUFA6,NDUFA7,NDUFA8,NDUFB1,NDUFB6,NDUFC2,PARK7,PMPCB,UQCC3,UQCRFS1,UQCRH,UQCRHL,COX7C
CC	GO:0031461	cullin-RING ubiquitin ligase complex	25/932	7.40244e-06	0.00033532	0.000284536	25	ANAPC10,ANAPC16,ANAPC5,CUL1,DCAF13,DCAF16,DCAF8,DET1,FBXW11,FBXW4,FZR1,IPP,KBTBD3,KBTBD4,KBTBD6,KBTBD7,KLHL11,KLHL22,KLHL26,KLHL42,KLHL8,PDCD6,PLRG1,USP47,ZSWIM5
CC	GO:0016607	nuclear speck	40/932	7.40319e-06	0.00033532	0.000284536	40	ACADM,ALKBH5,APBB1,BCAS2,C12orf57,CASC3,CHD5,CHTOP,CWC22,DDX42,DDX46,DHX15,EP400,FAM76B,GATAD2B,IK,LMNA,LUC7L3,MAGOH,MOCS2,NDUFB1,PLRG1,POLI,PPIE,PRKAA2,PRPF18,PRPF8,PUM1,RBM39,RBM8A,RFXAP,RSRC1,SF3A1,SF3B2,SPRTN,SRSF1,SRSF6,TRIP11,VPS72,WBP4
CC	GO:0071007	U2-type catalytic step 2 spliceosome	9/932	7.41354e-06	0.00033532	0.000284536	9	BCAS2,CWC22,PLRG1,PPIE,PRPF8,SNRPD1,SNRPD3,SNRPE,SNRPF
CC	GO:0070469	respiratory chain	17/932	8.38008e-06	0.000351963	0.000298659	17	COX7A2,NDUFA12,NDUFA13,NDUFA5,NDUFA6,NDUFA7,NDUFA8,NDUFB1,NDUFB6,NDUFC2,PARK7,PMPCB,UQCC3,UQCRFS1,UQCRH,UQCRHL,COX7C
CC	GO:0035869	ciliary transition zone	13/932	1.1086e-05	0.000432803	0.000367255	13	ARL3,B9D1,BBS4,FAM161A,IQCB1,NEK4,NPHP1,TCTN1,TCTN2,TMEM17,TMEM80,TTBK2,UNC119B
CC	GO:0031300	intrinsic component of organelle membrane	25/932	1.17769e-05	0.000432803	0.000367255	25	APOO,ATP6V1G2,B4GAT1,CASD1,FUNDC2,ITM2B,L2HGDH,MFF,MPC2,PEX10,PEX11B,PEX16,SCO1,SLC22A17,SLC25A4,SLC35B1,SMDT1,SPG7,STEAP2,SV2A,SYP,SYT4,TVP23B,UBIAD1,UQCC3
CC	GO:0000151	ubiquitin ligase complex	34/932	1.51775e-05	0.000524962	0.000445456	34	ANAPC10,ANAPC16,ANAPC5,ASB1,BMI1,CBX7,CUL1,DCAF13,DCAF16,DCAF8,DET1,DZIP3,FBXO21,FBXO8,FBXW11,FBXW4,FZR1,IPP,KBTBD3,KBTBD4,KBTBD6,KBTBD7,KLHL11,KLHL22,KLHL26,KLHL42,KLHL8,MED7,MPHOSPH8,PDCD6,PLRG1,USP33,USP47,ZSWIM5
CC	GO:1990204	oxidoreductase complex	17/932	3.86331e-05	0.00126201	0.00107088	17	BCKDHB,NDUFA12,NDUFA13,NDUFA5,NDUFA6,NDUFA7,NDUFA8,NDUFB1,NDUFB6,NDUFC2,OGDHL,PARK7,PMPCB,UQCC3,UQCRFS1,UQCRH,UQCRHL
CC	GO:0097542	ciliary tip	10/932	4.75945e-05	0.00147292	0.00124985	10	CYLD,DYNC2H1,IFT43,IFT46,IFT74,IFT88,KIF3A,TTC26,TTC30B,WDR34
CC	GO:0036064	ciliary basal body	16/932	0.000108954	0.00320324	0.00271811	16	B9D1,BBS1,BBS2,BBS4,CFAP20,CYLD,FAM161A,IFT46,IFT88,NEK4,PTPN23,TTBK2,TTC26,WDR34,WDR5B,WRAP73
CC	GO:0005813	centrosome	44/932	0.000120876	0.00338453	0.00287194	44	ARL3,B9D1,BBS1,BBS4,BCAS2,BRSK2,CEP126,CEP350,CEP44,CEP63,CEP70,CEP72,CEP97,CETN3,CRMP1,CYLD,DCAF13,DCTN4,DCTN6,DHX9,ERCC6L2,FAM161A,FBXW11,IFT46,IFT74,IQCB1,KIF3A,KIZ,KLHL22,MPLKIP,PHAX,PIBF1,PPP1R12A,RIC8B,SASS6,SMAD4,TCTEX1D2,TNKS,TTC26,USP33,UVRAG,WRAP73,ZNF12,BICD1
CC	GO:0031965	nuclear membrane	31/932	0.000131174	0.00350592	0.00297495	31	AHCTF1,CASC3,CEP70,CERS5,DNAJB14,DPY19L2,DUX4,FAM169A,FZR1,GNAQ,GTPBP4,HAX1,KLHDC2,LMNA,LPIN1,NUP133,NUP153,NUP205,NUP35,PLRG1,POM121C,PRPF38A,RANBP6,RIF1,SCRN1,SEPHS1,SYNE1,TNKS,TOR1AIP1,TSGA10,SLC30A1
CC	GO:0005747	mitochondrial respiratory chain complex I	10/932	0.000178615	0.00420104	0.00356479	10	NDUFA12,NDUFA13,NDUFA5,NDUFA6,NDUFA7,NDUFA8,NDUFB1,NDUFB6,NDUFC2,PARK7
CC	GO:0030964	NADH dehydrogenase complex	10/932	0.000178615	0.00420104	0.00356479	10	NDUFA12,NDUFA13,NDUFA5,NDUFA6,NDUFA7,NDUFA8,NDUFB1,NDUFB6,NDUFC2,PARK7
CC	GO:0045271	respiratory chain complex I	10/932	0.000178615	0.00420104	0.00356479	10	NDUFA12,NDUFA13,NDUFA5,NDUFA6,NDUFA7,NDUFA8,NDUFB1,NDUFB6,NDUFC2,PARK7
CC	GO:0097525	spliceosomal snRNP complex	11/932	0.00025322	0.00572666	0.00485935	11	LSM5,LUC7L3,PRPF18,PRPF8,SF3A1,SF3B2,SNRNP200,SNRPD1,SNRPD3,SNRPE,SNRPF
CC	GO:0000782	telomere cap complex	5/932	0.000280059	0.00588124	0.00499052	5	ACD,POT1,TERF1,TERF2,TERF2IP
CC	GO:0000783	nuclear telomere cap complex	5/932	0.000280059	0.00588124	0.00499052	5	ACD,POT1,TERF1,TERF2,TERF2IP
CC	GO:0030992	intraciliary transport particle B	6/932	0.000320056	0.0064894	0.00550658	6	IFT46,IFT74,IFT88,TTC26,TTC30A,TTC30B
CC	GO:0005750	mitochondrial respiratory chain complex III	5/932	0.00041782	0.0079251	0.00672485	5	PMPCB,UQCC3,UQCRFS1,UQCRH,UQCRHL
CC	GO:0045275	respiratory chain complex III	5/932	0.00041782	0.0079251	0.00672485	5	PMPCB,UQCC3,UQCRFS1,UQCRH,UQCRHL
CC	GO:0097526	spliceosomal tri-snRNP complex	7/932	0.000554775	0.0100775	0.00855123	7	LSM5,PRPF18,PRPF8,SNRNP200,SNRPD1,SNRPD3,SNRPE
CC	GO:0005868	cytoplasmic dynein complex	6/932	0.000565572	0.0100775	0.00855123	6	DCTN4,DYNC1I1,DYNC2H1,SNX4,TCTEX1D2,WDR34
CC	GO:0030532	small nuclear ribonucleoprotein complex	11/932	0.000647877	0.0112045	0.00950754	11	LSM5,LUC7L3,PRPF18,PRPF8,SF3A1,SF3B2,SNRNP200,SNRPD1,SNRPD3,SNRPE,SNRPF
CC	GO:0030990	intraciliary transport particle	7/932	0.00068608	0.0115261	0.00978051	7	IFT43,IFT46,IFT74,IFT88,TTC26,TTC30A,TTC30B
CC	GO:0005635	nuclear envelope	39/932	0.000716875	0.0116516	0.00988699	39	AHCTF1,CASC3,CEP70,CERS5,CSE1L,DNAJB14,DPY19L2,DST,DUX4,FAM169A,FZR1,GNAQ,GNAZ,GTPBP4,HAX1,KLHDC2,LMNA,LPIN1,NUP133,NUP153,NUP205,NUP35,PIK3R4,PLRG1,POM121C,PRKCZ,PRPF38A,RAB40B,RANBP6,RIF1,RNF180,SCRN1,SEPHS1,SYNE1,TERF2IP,TNKS,TOR1AIP1,TSGA10,SLC30A1
CC	GO:0005682	U5 snRNP	6/932	0.000733181	0.0116516	0.00988699	6	PRPF18,PRPF8,SNRNP200,SNRPD1,SNRPD3,SNRPE
CC	GO:0000313	organellar ribosome	12/932	0.00100432	0.0150213	0.0127463	12	MRPL27,MRPL30,MRPL35,MRPL49,MRPL50,MRPL57,MRPS14,MRPS21,MRPS31,MRPS33,MTERF4,NDUFA7
CC	GO:0005761	mitochondrial ribosome	12/932	0.00100432	0.0150213	0.0127463	12	MRPL27,MRPL30,MRPL35,MRPL49,MRPL50,MRPL57,MRPS14,MRPS21,MRPS31,MRPS33,MTERF4,NDUFA7
CC	GO:0071011	precatalytic spliceosome	7/932	0.00102186	0.0150213	0.0127463	7	BCAS2,PLRG1,PRPF38A,SF3B2,SNRPD1,SNRPD3,SNRPE
CC	GO:0005666	DNA-directed RNA polymerase III complex	5/932	0.00113968	0.0163447	0.0138693	5	CRCP,POLR1C,POLR2K,POLR3B,POLR3E
CC	GO:0005689	U12-type spliceosomal complex	6/932	0.001813	0.025382	0.0215379	6	DHX15,SF3B2,SNRPD1,SNRPD3,SNRPE,SNRPF
CC	GO:0005687	U4 snRNP	4/932	0.00220037	0.0288694	0.0244971	4	SNRPD1,SNRPD3,SNRPE,SNRPF
CC	GO:0034709	methylosome	4/932	0.00220037	0.0288694	0.0244971	4	SNRPD1,SNRPD3,SNRPE,SNRPF
CC	GO:0120114	Sm-like protein family complex	11/932	0.00220939	0.0288694	0.0244971	11	LSM5,LUC7L3,PRPF18,PRPF8,SF3A1,SF3B2,SNRNP200,SNRPD1,SNRPD3,SNRPE,SNRPF
CC	GO:0032592	integral component of mitochondrial membrane	10/932	0.00236243	0.030198	0.0256245	10	APOO,FUNDC2,L2HGDH,MFF,MPC2,SCO1,SLC25A4,SMDT1,SPG7,UQCC3
CC	GO:0098573	intrinsic component of mitochondrial membrane	10/932	0.00262959	0.0328978	0.0279154	10	APOO,FUNDC2,L2HGDH,MFF,MPC2,SCO1,SLC25A4,SMDT1,SPG7,UQCC3
CC	GO:0030286	dynein complex	8/932	0.00270457	0.033131	0.0281133	8	DCTN4,DNAH14,DNAL4,DYNC1I1,DYNC2H1,SNX4,TCTEX1D2,WDR34
CC	GO:0031304	intrinsic component of mitochondrial inner membrane	7/932	0.00283741	0.033368	0.0283144	7	APOO,L2HGDH,MPC2,SCO1,SMDT1,SPG7,UQCC3
CC	GO:0031305	integral component of mitochondrial inner membrane	7/932	0.00283741	0.033368	0.0283144	7	APOO,L2HGDH,MPC2,SCO1,SMDT1,SPG7,UQCC3
CC	GO:0005875	microtubule associated complex	16/932	0.00293884	0.0338831	0.0287515	16	APPBP2,DCTN4,DCTN6,DNAH14,DNAL4,DYNC1I1,DYNC2H1,KIF3A,KIF5A,KLC2,MAP2,RANBP9,SNX4,TCTEX1D2,WDR34,YWHAE
CC	GO:0036038	MKS complex	4/932	0.00305384	0.0345319	0.029302	4	B9D1,TCTN1,TCTN2,TMEM17
CC	GO:0005685	U1 snRNP	5/932	0.0031749	0.0345711	0.0293353	5	LUC7L3,SNRPD1,SNRPD3,SNRPE,SNRPF
CC	GO:0005686	U2 snRNP	5/932	0.0031749	0.0345711	0.0293353	5	SF3A1,SF3B2,SNRPD1,SNRPD3,SNRPE
CC	GO:0005819	spindle	28/932	0.0033951	0.0362967	0.0307996	28	ARL3,CBX1,CENPV,CEP104,CEP350,CEP44,CEP63,CRMP1,CYLD,DCTN4,DYNC1I1,FAM161A,IK,IQCB1,KIF3A,KLHL22,KLHL42,LATS1,MAP9,MYH9,RIF1,SBDS,SKA2,TADA3,TCTEX1D2,TERF1,TNKS,MTUS1
CC	GO:0005759	mitochondrial matrix	36/932	0.00402681	0.0422816	0.035878	36	ABAT,ACADM,AUH,BCKDHB,COQ3,DHX30,FASTKD2,GRPEL1,LIAS,MRPL27,MRPL30,MRPL35,MRPL49,MRPL50,MRPL57,MRPS14,MRPS21,MRPS31,MRPS33,MRRF,MTERF2,MTERF4,MUT,NDUFA7,NDUFAF7,OGDHL,PARK7,PMPCB,PRIMPOL,RAD51,SIRT3,SMDT1,SUCLA2,SUCLG1,TEFM,TRIT1
MF	GO:0140098	catalytic activity, acting on RNA	38/904	5.51594e-05	0.0435208	0.0415147	38	AARSD1,ALKBH5,CMTR1,CRCP,DDX1,DDX25,DDX42,DDX46,DDX47,DDX50,DHX15,DHX30,DHX9,DIS3L2,DUS4L,EIF4A2,ELAC1,EPRS,EXOSC9,LCMT2,LRRC47,METTL15,POLR1B,POLR1C,POLR2K,POLR3B,POLR3E,PRIMPOL,PRPF18,PRPF8,SNRNP200,TRIT1,TRMT112,TRMT13,TSNAX,TYW1,XRN1,ZCCHC11
KEGG	hsa03040	Spliceosome	22/333	3.65773e-08	9.69298e-06	9.58709e-06	22	BCAS2,DDX42,DDX46,DHX15,HNRNPK,LSM5,MAGOH,PLRG1,PPIE,PRPF18,PRPF38A,PRPF8,RBM8A,SF3A1,SF3B2,SNRNP200,SNRPD1,SNRPD3,SNRPE,SNRPF,SRSF1,SRSF6
KEGG	hsa05016	Huntington disease	21/333	5.59261e-05	0.00661419	0.00654194	21	COX7A2,DCTN4,DNAH14,DNAL4,GNAQ,NDUFA12,NDUFA13,NDUFA5,NDUFA6,NDUFA7,NDUFA8,NDUFB1,NDUFB6,NDUFC2,PLCB4,POLR2K,SLC25A4,UQCRFS1,UQCRH,UQCRHL,COX7C
KEGG	hsa05010	Alzheimer disease	19/333	9.53038e-05	0.00661419	0.00654194	19	APBB1,CACNA1D,COX7A2,GNAQ,NAE1,NDUFA12,NDUFA13,NDUFA5,NDUFA6,NDUFA7,NDUFA8,NDUFB1,NDUFB6,NDUFC2,PLCB4,UQCRFS1,UQCRH,UQCRHL,COX7C
KEGG	hsa04714	Thermogenesis	23/333	9.98368e-05	0.00661419	0.00654194	23	ACTL6B,COA5,COX14,COX20,COX7A2,LIPE,NDUFA12,NDUFA13,NDUFA5,NDUFA6,NDUFA7,NDUFA8,NDUFAF3,NDUFAF7,NDUFB1,NDUFB6,NDUFC2,PRKAA2,RPS6KA6,UQCRFS1,UQCRH,UQCRHL,COX7C
KEGG	hsa04723	Retrograde endocannabinoid signaling	17/333	0.000147568	0.0078211	0.00773567	17	CACNA1D,GABRB3,GABRG2,GNAQ,GNB1,GRIA2,NAPEPLD,NDUFA12,NDUFA13,NDUFA5,NDUFA6,NDUFA7,NDUFA8,NDUFB1,NDUFB6,NDUFC2,PLCB4
KEGG	hsa05012	Parkinson disease	16/333	0.000287734	0.0109445	0.0108249	16	COX7A2,NDUFA12,NDUFA13,NDUFA5,NDUFA6,NDUFA7,NDUFA8,NDUFB1,NDUFB6,NDUFC2,PARK7,SLC25A4,UQCRFS1,UQCRH,UQCRHL,COX7C
KEGG	hsa03060	Protein export	6/333	0.0002891	0.0109445	0.0108249	6	IMMP1L,SEC61A2,SEC63,SRP68,SRP72,SRP9
KEGG	hsa05168	Herpes simplex virus 1 infection	37/333	0.000348816	0.0115545	0.0114283	37	MAP3K7,RBAK,SRSF1,SRSF6,ZFP37,ZNF112,ZNF12,ZNF132,ZNF136,ZNF14,ZNF181,ZNF235,ZNF248,ZNF25,ZNF253,ZNF286A,ZNF304,ZNF334,ZNF33B,ZNF416,ZNF484,ZNF510,ZNF540,ZNF543,ZNF550,ZNF567,ZNF568,ZNF569,ZNF582,ZNF595,ZNF611,ZNF614,ZNF615,ZNF658,ZNF709,ZNF791,ZNF91
KEGG	hsa00190	Oxidative phosphorylation	15/333	0.000438742	0.0129185	0.0127774	15	ATP6V1G2,COX7A2,NDUFA12,NDUFA13,NDUFA5,NDUFA6,NDUFA7,NDUFA8,NDUFB1,NDUFB6,NDUFC2,UQCRFS1,UQCRH,UQCRHL,COX7C
KEGG	hsa00280	Valine, leucine and isoleucine degradation	8/333	0.000772862	0.0204808	0.0202571	8	AACS,ABAT,ACADM,ALDH9A1,AUH,BCKDHB,HMGCLL1,MUT
KEGG	hsa04932	Non-alcoholic fatty liver disease (NAFLD)	15/333	0.00143879	0.0346618	0.0342832	15	COX7A2,NDUFA12,NDUFA13,NDUFA5,NDUFA6,NDUFA7,NDUFA8,NDUFB1,NDUFB6,NDUFC2,PRKAA2,UQCRFS1,UQCRH,UQCRHL,COX7C
BP, Biological Process; CC, Cellular Components; MF, Molecular Function
